# Supplementary material
Source: PubMed Central journal article supplement (PMC5542026)
Supplement: NIHMS880303-supplement-Supplemental_Tables.pdf [file NIHMS880303-supplement-Supplemental_Tables.pdf]

**Table S1. Selectivity of RNAP-inhibitory activity (related to Fig. 1B)**

| enzyme                                                | IC50 ( $\mu\text{M}$ ) ( $\pm$ SEM) | selectivity ratio |
|-------------------------------------------------------|-------------------------------------|-------------------|
| <b>promoter-dependent transcription</b>               |                                     |                   |
| <b><i>E. coli</i> RNAP</b>                            |                                     |                   |
| 6.25 $\mu\text{M}$ UTP                                | 0.1                                 | [1]               |
| 50 $\mu\text{M}$ UTP                                  | 2                                   | [1]               |
| 250 $\mu\text{M}$ UTP                                 | 8                                   | [1]               |
| <b>human RNAP I</b>                                   |                                     |                   |
| 6.25 $\mu\text{M}$ UTP                                | >50                                 | >500              |
| 50 $\mu\text{M}$ UTP                                  | ND                                  | ND                |
| 250 $\mu\text{M}$ UTP                                 | ND                                  | ND                |
| <b>human RNAP II</b>                                  |                                     |                   |
| 6.25 $\mu\text{M}$ UTP                                | 1                                   | 10                |
| 50 $\mu\text{M}$ UTP                                  | 7                                   | 4                 |
| 250 $\mu\text{M}$ UTP                                 | >20                                 | >3                |
| <b>human RNAP III</b>                                 |                                     |                   |
| 6.25 $\mu\text{M}$ UTP                                | 9                                   | 90                |
| 50 $\mu\text{M}$ UTP                                  | ND                                  | ND                |
| 250 $\mu\text{M}$ UTP                                 | ND                                  | ND                |
| <b>promoter-independent transcription</b>             |                                     |                   |
| <b><i>E. coli</i> RNAP</b>                            |                                     |                   |
| 1.56 $\mu\text{M}$ UTP                                | 0.9 ( $\pm$ 0.1)                    | [1]               |
| 25 $\mu\text{M}$ UTP                                  | 4 ( $\pm$ 0.7)                      | [1]               |
| 400 $\mu\text{M}$ UTP                                 | 10 ( $\pm$ 2)                       | [1]               |
| <b>HeLa nuclear extract (human RNAP I / II / III)</b> |                                     |                   |
| 1.56 $\mu\text{M}$ UTP                                | 4 ( $\pm$ 0.1)                      | 4                 |
| 25 $\mu\text{M}$ UTP                                  | 15 ( $\pm$ 6)                       | 4                 |
| 400 $\mu\text{M}$ UTP                                 | 51 ( $\pm$ 30)                      | 5                 |

**Table S2. Antibacterial activity *in vivo* (mouse *S. pyogenes* peritonitis model; 7 day survival) (related to Fig. 1D)**

| intravenous (iv) administration,<br>10 min and 6 h post-infection |                   | intravenous (iv) administration,<br>10 min post-infection |                   | subcutaneous (sc) administration,<br>10 min post-infection |                   |
|-------------------------------------------------------------------|-------------------|-----------------------------------------------------------|-------------------|------------------------------------------------------------|-------------------|
| PUM total dose<br>(mg/kg)                                         | survivors / total | PUM total dose<br>(mg/kg)                                 | survivors / total | PUM total dose<br>(mg/kg)                                  | survivors / total |
| 50                                                                | 7 / 8             | 40                                                        | 5 / 8             | 40                                                         | 6 / 8             |
| 20                                                                | 6 / 8             | 16                                                        | 4 / 8             | 16                                                         | 2 / 8             |
| 8                                                                 | 5 / 8             | 6.4                                                       | 0 / 8             | 6.4                                                        | 1 / 8             |
| 3.2                                                               | 0 / 8             | 2.56                                                      | 2 / 8             | 2.56                                                       | 1 / 8             |
| 0                                                                 | 0 / 8             | 1.024                                                     | 0 / 8             | 1.024                                                      | 0 / 8             |
|                                                                   |                   | 0                                                         | 0 / 8             | 0                                                          | 0 / 8             |

**Table S3. Data collection and refinement statistics (related to Fig. 4)**

|                                                      | <b>RPo-GpA-PUM</b>      | <b>RPo-GpA-CMPcPP</b>   |
|------------------------------------------------------|-------------------------|-------------------------|
|                                                      | <b>(PDB: 5X21)</b>      | <b>(PDB: 5X22)</b>      |
| <b>data collection</b>                               |                         |                         |
| space group                                          | C2                      | P2 <sub>1</sub>         |
| cell dimensions                                      |                         |                         |
| <i>a, b, c</i> (Å)                                   | 186.8, 103.1, 296.2     | 186.4, 104.3, 297.3     |
| $\alpha, \beta, \gamma$ (°)                          | 90.0, 98.7, 90.0        | 90.0, 98.4, 90.0        |
| resolution (Å)                                       | 40.00-3.30 (3.36-3.30)* | 50.00-3.35 (3.41-3.35)* |
| <i>R</i> <sub>syn</sub> or <i>R</i> <sub>merge</sub> | 0.138 (0.633)           | 0.197 (>1.0)            |
| <i>I</i> / $\sigma$ ( <i>I</i> )                     | 8.4 (1.7)               | 7.7 (1.8)               |
| completeness (%)                                     | 0.920 (0.874)           | 0.956 (0.891)           |
| redundancy                                           | 3.4 (3.4)               | 5.3 (5.3)               |
| <b>refinement</b>                                    |                         |                         |
| resolution (Å)                                       | 50.00-3.32              | 50.00-3.33              |
| number of reflections                                | 70085                   | 147976                  |
| <i>R</i> <sub>work</sub> / <i>R</i> <sub>free</sub>  | 0.232/0.280             | 0.208/0.250             |
| number of atoms                                      |                         |                         |
| protein/DNA/RNA                                      | 28662                   | 56787                   |
| ligand/ion                                           | 42                      | 76                      |
| water                                                | 35                      | 0                       |
| <i>B</i> factors                                     |                         |                         |
| protein                                              | 61.6                    | 41.8                    |
| ligand/ion                                           | 31.8                    | 21.0                    |
| Water                                                | 34.3                    | -                       |
| r.m.s deviations                                     |                         |                         |
| bond lengths (Å)                                     | 0.002                   | 0.007                   |
| bond angles (°)                                      | 0.542                   | 0.834                   |

\*Values in parentheses are for highest-resolution shell.

**Table S4. Oligonucleotides (related to STAR Methods section)**

| name                                             | sequence                                                                                                                                                                                                                                                                                                                                                                                                                                                                                                           |
|--------------------------------------------------|--------------------------------------------------------------------------------------------------------------------------------------------------------------------------------------------------------------------------------------------------------------------------------------------------------------------------------------------------------------------------------------------------------------------------------------------------------------------------------------------------------------------|
| <i>recA</i> promoter DNA fragment 1              | 5'-GGCGACCGTGATGCGGTGCGTCGTCAGGCTACTGCGTATGCATTGCAGACCTTGTGGCAAC<br>AATTTCTACAAAACACTTGATACTGTATGAGCATAACAGTATAAATTGCTTCAGATCTCTAGAAGCT<br>TTAATGCGGTAGTTTATCACAGTTAAATTGCTAACGCAGTCAGGCACCGTGTATGAAATCTAAC<br>AATGCGCTCATCGTCATCCTCGGCACCGTCACCCTGGATGCTCTAGGCATAGGCTTGGTTATG<br>CCGGTACTGCCGGCCTCTTGCGGGATATCGTCCATTCCGACAGCATCGCCAGTCACTATGG<br>CGTGTCTAGCGCTATATGCGTTGATGCAATTTCTATGCGCACCCGTTCTCGGAGCACTGTC<br>CGACCGCTTTGGCCGCCGCCAGTCTGCTCGCTTCGCTACTTGGAGCCACTATCGACTACG<br>CGATCATGGCGACCACACCCGTCCTGT-3' |
| <i>recA</i> promoter DNA fragment 2              | 5'-GGCGACCGTGATGCGGTGCGTCGTCAGGCTACTGCGTATGCATTGCAGACCTTGTGGCAAC<br>AATTTCTACAAAACACTTGATACTGTATGAGCATAACAGTATAAATTGCTTCAGATCTCTAGAAGCT<br>AAGTTAGTTCGTTACGCGACACGCGGCAACAAG-3'                                                                                                                                                                                                                                                                                                                                    |
| <i>recA</i> promoter DNA fragment 3              | 5'-GGCGACCGTGATGCGGTGCGTCGTCAGGCTACTGCGTATGCATTGCAGACCTTGTGGCAAC<br>AATTTCTACAAAACACTTGATACTGTATGAGCATAACAGTATAAATTGCTTCAGATCTCTAGAAGCT<br>AAGGAGACCAACGCAGCGACACGCGGCAACAAG-3'                                                                                                                                                                                                                                                                                                                                    |
| bacteriophage T4 N25 promoter DNA fragment       | 5'-TTGCTTTTCAGGAAAATTTTTCTGTATAATAGATTCATAAATTTGAGAGAGGAGTTTAAATATGG<br>CTGGTTCTCGCGAGAATTCCGAATAGCCATCCCAATCGAACAGGCCTGCTGGTAATCGCAGGC<br>TTTTTATTT-3'                                                                                                                                                                                                                                                                                                                                                            |
| Cy5-labelled <i>lacUV5</i> promoter DNA fragment | 5'-Cy5-AGGCTTTACACTTTATGCTTCCGGCTCGTATAATGTGTGGAATTGTGAGCGGATA-3'                                                                                                                                                                                                                                                                                                                                                                                                                                                  |
| <i>S. pyogenes rpoB</i> forward primer           | 5'-GGGCAAATGATAACTTAGTTGCGATTGCTG-3'                                                                                                                                                                                                                                                                                                                                                                                                                                                                               |
| <i>S. pyogenes rpoB</i> reverse primer           | 5'-CCTTTCTGCCTTTGATGACTTTACCAGTTC-3'                                                                                                                                                                                                                                                                                                                                                                                                                                                                               |
| <i>S. pyogenes rpoC</i> forward primer           | 5'-GCTCAAGAACTCAAGAAGTTTCTGAAACAACTGAC-3'                                                                                                                                                                                                                                                                                                                                                                                                                                                                          |
| <i>S. pyogenes rpoC</i> reverse primer           | 5'-GTCAATGCTTTTTACTGCCAACAACTCAGAC-3'                                                                                                                                                                                                                                                                                                                                                                                                                                                                              |

**Table S5. Nucleic-acid scaffolds for single-nucleotide-addition reactions (related to STAR Methods section)**

| incoming NTP | RNA 3' end | nucleic-acid scaffold <sup>1</sup>                                                   |
|--------------|------------|--------------------------------------------------------------------------------------|
| UTP          | G          | 5' - ACGCCAGACAGGG - 3'<br>3' - GCCGCGCGCATGCGGTCTGTCCC - 5'<br>5' - *CGGCGCGCG - 3' |
| GTP          | G          | 5' - ACGCCAGACAGGG - 3'<br>3' - GCCGCGCGCCTGCGGTCTGTCCC - 5'<br>5' - *CGGCGCGCG - 3' |
| ATP          | G          | 5' - tCGCCAGACAGGG - 3'<br>3' - GCCGCGCGCTaGCGGTCTGTCCC - 5'<br>5' - *CGGCGCGCG - 3' |
| CTP          | G          | 5' - ACGCCAGACAGGG - 3'<br>3' - GCCGCGCGCGTGCGGTCTGTCCC - 5'<br>5' - *CGGCGCGCG - 3' |
| UTP          | A          | 5' - ACGCCAGACAGGG - 3'<br>3' - GCCGCGCGTATGCGGTCTGTCCC - 5'<br>5' - *CGGCGCGCA - 3' |
| GTP          | A          | 5' - ACGCCAGACAGGG - 3'<br>3' - GCCGCGCGTCTGCGGTCTGTCCC - 5'<br>5' - *CGGCGCGCA - 3' |
| ATP          | A          | 5' - tCGCCAGACAGGG - 3'<br>3' - GCCGCGCGTTaGCGGTCTGTCCC - 5'<br>5' - *CGGCGCGCA - 3' |
| CTP          | A          | 5' - ACGCCAGACAGGG - 3'<br>3' - GCCGCGCGTGCGGTCTGTCCC - 5'<br>5' - *CGGCGCGCA - 3'   |
| UTP          | U          | 5' - ACGCCAGACAGGG - 3'<br>3' - GCCGCGCGAATGCGGTCTGTCCC - 5'<br>5' - *CGGCGCGCU - 3' |
| GTP          | U          | 5' - ACGCCAGACAGGG - 3'<br>3' - GCCGCGCGACTGCGGTCTGTCCC - 5'<br>5' - *CGGCGCGCU - 3' |
| ATP          | U          | 5' - tCGCCAGACAGGG - 3'<br>3' - GCCGCGCGATaGCGGTCTGTCCC - 5'<br>5' - *CGGCGCGCU - 3' |
| CTP          | U          | 5' - ACGCCAGACAGGG - 3'<br>3' - GCCGCGCGAGTGCGGTCTGTCCC - 5'<br>5' - *CGGCGCGCU - 3' |
| UTP          | C          | 5' - ACGCCAGACAGGG - 3'<br>3' - GCCGCGCGGATGCGGTCTGTCCC - 5'<br>5' - *CGGCGCGCC - 3' |
| GTP          | C          | 5' - ACGCCAGACAGGG - 3'<br>3' - GCCGCGCGGCTGCGGTCTGTCCC - 5'<br>5' - *CGGCGCGCC - 3' |
| ATP          | C          | 5' - tCGCCAGACAGGG - 3'<br>3' - GCCGCGCGGTaGCGGTCTGTCCC - 5'<br>5' - *CGGCGCGCC - 3' |
| CTP          | C          | 5' - ACGCCAGACAGGG - 3'<br>3' - GCCGCGCGGGTGCGGTCTGTCCC - 5'<br>5' - *CGGCGCGCC - 3' |

<sup>1</sup>black, DNA; red, RNA, asterisk, <sup>32</sup>P.
